# Supplementary material for: Multi-Omics Study on the Molecular Mechanisms of Tetraodon Nigroviridis Resistance to Exogenous Vibrio Parahaemolyticus Infection
Source: Frontiers journal article supplement (doi:10.3389/fmars.2022.914028), 2022-07-22
Supplement: Table_5.XLSX [file Table_5.XLSX]

## Sheet: Sheet4
Table S5. The primer sequence of genes by qRT-PCR.
Gene	Primer sequence	amplification
IFNR2	F:TGGGAGCTGATCAAGGTCTA	qRT-PCR
	R:GGTTGAACGTGACTCCTCAG
PIGR	F:AGACGGGTTCTGATGGCT	qRT-PCR
	R:CTCGGTGGTGGATGTGC
CCL3	F:TGGCTGTGACCCTGCTC	qRT-PCR
	R:TGCGGTGTCGCTGAACT
IL-1β	F:CAGATGTCCAACAACGGCAAGA	qRT-PCR
	R:TGTCCAGGGCGATGATGAGG
C1qa	F:CCCTTGGCAAGAAAGTGACCTATC	qRT-PCR
	R:GACTCCAGCCAAACCTTCTGCCCA
C3	F:GAAAGGACACCTGGGTGGAG	qRT-PCR
	R:GACTCTTGCATTTGACCGGC
C5	F:CCAGGTATCTGATCACCGCC	qRT-PCR
	R:ATCAGGAGCCATGGAGGTCT
IL17f	F:AAGCGAGGTCAAGGGTCAAG	qRT-PCR
	R:CGACTGTTGCTAGGCGATCT
IL15	F:CATCAAGCAGAACGTGCAGTC	qRT-PCR
	R:ACCTCATGGTGGACTTGGGA
UNC13B	F:GGAGGTCTATGTCATCAGTAAAGC	qRT-PCR
	R:AAATGGAACTTCTCCTCCCACACA
	R:GACTCCAGCCAAACCTTCTGCCCA
IL1R2	F:CCGAAGGCTGCCAGATTGAA	qRT-PCR
	R:CCAGAGGAACACCGAGACCAC
CD22	F:GCACTGAACAAACACGGGAC	qRT-PCR
	R:TGTCATTGTCGCGGTACCAA
PTPN7	F:AATCCACAACAGCAGCACCG	qRT-PCR
	R:CGCTAACAGCCACCACAAAA
IGH	F:GCCATCGTCCCTGACTTACA	qRT-PCR
	R:GTCCCAGTCGTTTCTGTTCACC
CCL19	F:CCTCGCACGGCTATAAATGC	qRT-PCR
	R:GGAGGCCATGTCTCTGGTTC
CD321	F:TCAGACAAGGAACCTCGGGA	qRT-PCR
	R:GTGAAGTTGGACCTCCCGTT
cd22	F:ACCTTTGGCAGAGACCAGTG	qRT-PCR
	R:ACATAGCTCCCTTCATCGGC
FOS	F:TGCAGAAGACAACGACCTGG	qRT-PCR
	R:GAGCGTTGGTGAGTTGAGGT
JUN	F:CCCAAAGCGCTGAAACACAA	qRT-PCR
	R:TGGTGGTGATGAGTCCGTTG
MKNK	F:GACATCCCAGACGCCAAGAA	qRT-PCR
	R:GATGCACGTTTGCACTCTGG
C1QB	F:CCGAAGGGAGAGACAGGAGA	qRT-PCR
	R:CAAGTCGGGCAGGAACTCTT
MKP	F:CTGGACGAGGCCTTTGAGTT	qRT-PCR
	R:GGATGGAGACCGGGAAGTTG
IL10RA	F:AAAGAGCACAAGGTGGAGGG	qRT-PCR
	R:CGGATACTCGGTCTGGTTGG
IL13RA	F:GGTGCTGCAAACACAAAGGT	qRT-PCR
	R:AGGGAGGGATGATTTGGGGA
CCL21	F:CTCAACGCGCTGTTTTTCCT	qRT-PCR
	R:ACTGCTCTTTGGGGTCTGTG
CCR2	F:TCCTGCATCGCAAGGGTAAG	qRT-PCR
	R:TCAGGCAGCAGTGTGTGTAG
GAPDH	F:CGACAAACTGCCTGGCTCCC	qRT-PCR
	R:GGGCCGTCCACGGTCTTCT

## Sheet: 6.30进货
	名称	数量	底价	款式	总价
1舒芙蕾	舒芙蕾厚杯	14	148	绿色：70A、 75A/2件、 75b、 85A 80b、	2072
				粉色： 70b、 75A/2件、75b/2件、 80A/2件、80b、		马红梅
				黑色： 85A
	内裤	2	31
				M绿 粉 L	62
	薄杯	7	148	绿色： 75C、 80b、80C、85C、	1184
				粉色： 80C/2件、 85C、90b		四姨
2氢气	氢气	11	118	灰色： M/1件、L/件	1298
				粉色： S/1件、M/2件、L/2件、 XL/2件（提1）		L我和舒婷。XL 姨。 S 南海所
				焦糖： M/1件、L/1件
	内裤	2		灰色 ：均码
				粉色
3薄雾	文胸	4	130	粉色： 75b、 75C、 80b	520
				紫色： 75b、		扣子
	内裤	2		M
				L
	吊带裙	1	163	粉 ：M	163
4无尽夏	无尽夏	1	138	静谧肤：70A	276
				紫色： 70B （主打色）
5焦糖	焦糖	2	130	雅灰色 ： 75A	130
				焦糖色： 75B
6从容	从容	15	128	粉色： 75b、75C、80b/12件、85 B/12件 、80c 、85C， 85D/12件、90B、	1920	90B 四姨 85D 三姨 85B 5姨 80B 马红梅
				婴儿蓝： 80b、85 B、85C、90 B
7茧爱	文胸	7		海贝粉： 80B、80C 85 B、85C、85D		妈
				焦糖红：75B、
				月光灰：80B、85B、
	平角裤	2		粉色： L
				焦糖红：M
8艾护	文胸	1		80B
9涟漪	文胸	3	108	白色： M	648
				绿色： S		朱栋华
				黑色： L
10芍药	无肩带	2	128	粉色： 75B	256
				黑 色： 75 A 、
11艾+家居	男	1	273	蓝绿色 XXL	273	刘老师
	女	2	228	粉 色： M/件 抹茶色/1件	456	刘老师	赵越
	男童	2	158	110、 120 蓝绿色	316	刘老师	和平
	女童	1	108	130 抹茶色	108	刘老师
12薄荷凉	五分裤	1	118	M、	118
	九分裤	1	118	M	118
13outdoor	运动短裤(T+内衣+短裤)	1	120+108	粉： M
14男士内裤	3条装	1		藏青L
15咖啡瘦	高腰	1	210	肤色 ：XX L
赠品
从容	丁字裤	1		艳粉色S
	睡裙	1		珍珠白L
无尽夏	内裤	1		黑色M
	文胸	1		黑色70B		徐静静
真我	内衣	1		黑色70B
	内裤	1		黑色M
秘密	内衣	1		黑色M
	内裤	1		黑色70B
芍药	内衣	1		粉色M
	内裤	1		粉色70B
花蕊	内衣	1		黑色70B
	内裤	1		黑色S
7月 2 补货
秘密	内衣	1	118	粉色 85A	258		大头
男士内裤	3条装	1	130	酒红 75A			大头
天鹅	文胸	1	128		268		大头1
舒芙蕾	魔杯	1	148	85A 粉			大头
咖啡瘦	高腰	1	210	肤色 ：XX L			春晖姐发	大头
7月9号补货
蓝绿色	男宝 艾家居		158	蓝绿色130	华大公寓		扣子
艾家居	女 童		158	粉130			大头
outdoor		3合1	228	M粉			120+108	国霞
舒芙蕾			148	75A粉			大头
马卡龙换天鹅			128	70A 肤色	姗姗	未
舒芙蕾厚			148	70A 粉色		未
舒芙蕾厚			148	A75	迎子		于辉
从容		1	128	B85			于辉
氢气			118	M
7月14号
氢气		3	354	灰 M 红 S 灰 S 粉L 粉XL（提）	4
蝉翼			130	黑色 75 B
艾护			153	85 C	彩霞
花瓣				85 C XL	彩霞
艾居家	男爸爸		273	XL	彩霞
舒芙蕾	绿		148	80A	未到	还黑色
舒芙蕾	粉		148	80B	未到
	短裤	1	34	粉 L	彩霞
out door. 3件		1	228	L	彩霞
骑行裤	短裤	1		L
薄雾	紫	1		M	到
大水杯		1			到
大露背				蓝S 黑 XXL	到
					钱未给
茧爱，舒芙蕾，涟漪，薄雾和焦糖的内裤都好穿
马卡龙			90		姗姗
菠萝袜
运费
7月23
薄雾			34
从容	从容		128	酒红 95B	148
茧爱			118	90B 孔雀蓝	148
舒芙蕾	模杯		592	80A 蓝/粉 80/B粉 80/B 蓝	148
	短裤		34	80A 黑	148
舒芙蕾	模杯文胸		148	粉 70B
	短裤		238	M 粉 /2 L 粉/2 M 绿/2 L 绿/2
从容	文胸		128	白75B
艾家	女 粉		456	XL		江苏省盐城市射阳县阳光海岸16号楼1903，於红霞，13382632886
艾家	男绿		273	2XL
艾家	绿色 宝宝		158	110
奶油玫瑰	黄			XL
熏香	1	68成本
氢气	短裤		170	粉 M /2 粉L/ 2 灰L
🍵迎子	大水壶	1
	花瓣	1
	奶油	1
	香熏	1组
	宣传册	5
44413
从容		1		85C白
		1		80C白
薄雾		1		80C紫
自在		2		蓝色 MS	买来货
8月23
天鹅	银色	1套		四川省成都市双流区东升镇隆鑫十里画卷。杨琪 18224436089
大露背	白色	XL
自在	黄色	85C
云朵	文胸
	内裤
天鹅	文胸
	内裤
差旅
